# Supplementary material
Source: PubMed Central journal article supplement (PMC4012500)
Supplement: 90281c9339e83bd11eae2c426d3ba302_genetics.114.161778-6.pdf [file 90281c9339e83bd11eae2c426d3ba302_genetics.114.161778-6.pdf]

**Table S1 Difference in coverage between coding and non-coding areas.** Coding sequence regions were collected from Ensemble database (release 74) of each species' genome. A 5 Mb genomic region on Chromosome 1 of *C. intestinalis* and reftig 1 of *C. savignyi* were used for sampling differences in coverage in each sample.

| Species                | CDS      |                     | non-CDS  |                     | Average  |
|------------------------|----------|---------------------|----------|---------------------|----------|
|                        | Coverage | Fraction of Average | Coverage | Fraction of Average | Coverage |
| <i>C. savignyi</i>     | 34.15    | 1.42                | 22.34    | 0.93                | 24.06    |
| <i>C. intestinalis</i> | 52.23    | 1.06                | 48.68    | 0.99                | 49.29    |
