# Supplementary material
Source: PubMed Central journal article supplement (PMC4012500)
Supplement: c404e2e828c5979bbcd4fa3a6496b38f_genetics.114.161778-3.pdf [file c404e2e828c5979bbcd4fa3a6496b38f_genetics.114.161778-3.pdf]

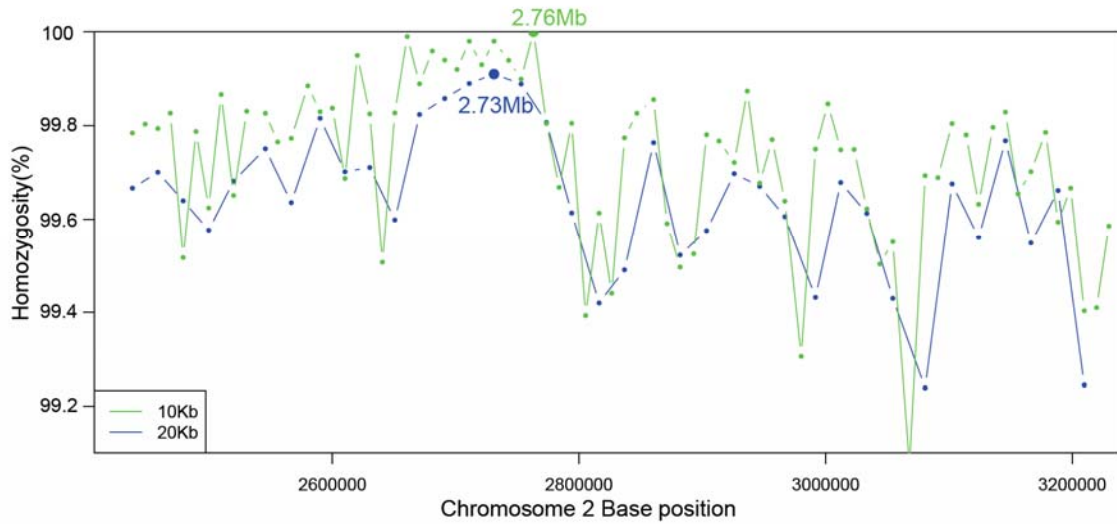

**Figure S3** Window size differences for *C. intestinalis chongmague* genome-wide mapping. A zoomed in area of chromosome 2, near the peak calls for both a 10 Kb (green) and 20 Kb (blue) window analysis of homozygosity. Peaks of each analysis are shown as larger solid filled circles with positional values indicated next to each point.
