# Supplementary material
Source: PubMed Central journal article supplement (PMC4012500)
Supplement: ceef1dccdd2bf365a006693180ccf9d7_genetics.114.161778-5.pdf [file ceef1dccdd2bf365a006693180ccf9d7_genetics.114.161778-5.pdf]

**Table S2 Primers for qRT-PCR**

| Gene                  | Forward Primer       | Reverse Primer        |
|-----------------------|----------------------|-----------------------|
| ci-Actin              | CCAGCAGATTCCATACCAAG | CGTTTTCCCATCCATCGTAG  |
| ci-alpha Laminin PP#1 | CGGTGACGAAAATGAGGAAC | AGACACCACCACCCTCGTAG  |
| ci-alpha Laminin PP#2 | TCAAGTTGGTTCCGCATGTA | GTTCCACATTCCACCAATCC  |
| cs-CAV3 PP#1          | GCGCATTTTGGTCATGCTAC | GGCTTGCCCACTTGATAATG  |
| cs CAV3 PP#2          | ACCATTTTGTTCGCCTTTT  | ATTGAAGATATTGGGGTCCA  |
| cs RPS27A             | CCACCTGATCAGCAGAGGTT | TTATTCGCCCTCTGGTTTGA  |
| cs Rab21              | TTCGTGGTGGGAAATAAAGC | GTTTTCCGTTTTTCACGCAAT |
| cs FLRT2              | GTACACTGCTGCGAGGAACA | CCGTCTGATTGGTGGAAAGT  |
| cs M.R.               | CCGATGCTACGCCTATGACT | AGCCTCTACGTCGCCATCTA  |
