# Supplementary material
Source: PubMed Central journal article supplement (PMC4012500)
Supplement: d42a45f85980030f6d15bf79d4d2d73d_genetics.114.161778-7.pdf [file d42a45f85980030f6d15bf79d4d2d73d_genetics.114.161778-7.pdf]

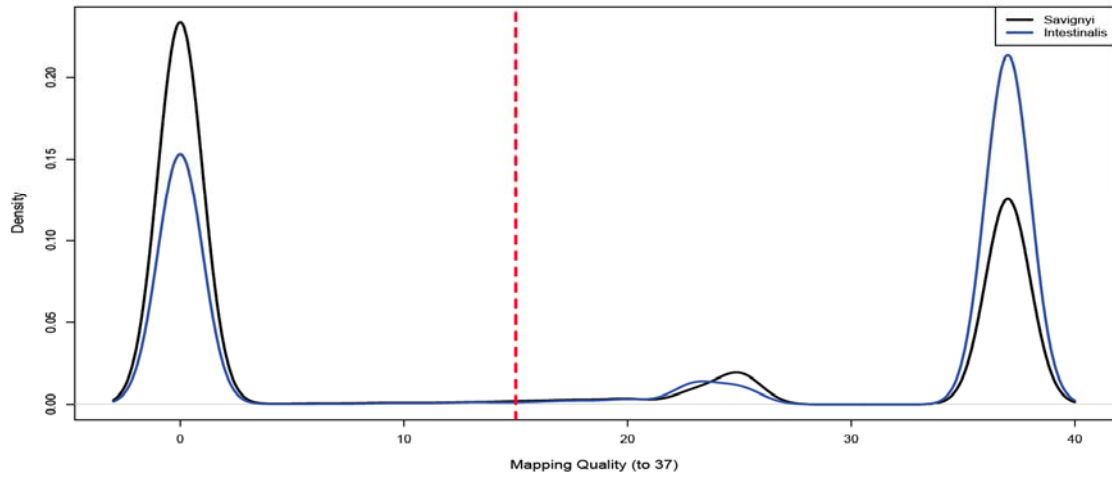

**Figure S1** A probability density graph of distribution of read alignment mapping qualities in a *C. intestinalis* (blue line) and *C. savignyi* (black line) dataset is shown at bottom. Mapping qualities range from 0 to 37, with higher numbers meaning better quality alignment (Li *et al.* 2009). Red dashed line indicates the MapQ value of 15, which was used as the cutoff for mapping analysis.
