# Supplementary material
Source: PubMed Central journal article supplement (PMC4012500)
Supplement: de37f080ea5608ff8386c64b185d2404_genetics.114.161778-2.pdf [file de37f080ea5608ff8386c64b185d2404_genetics.114.161778-2.pdf]

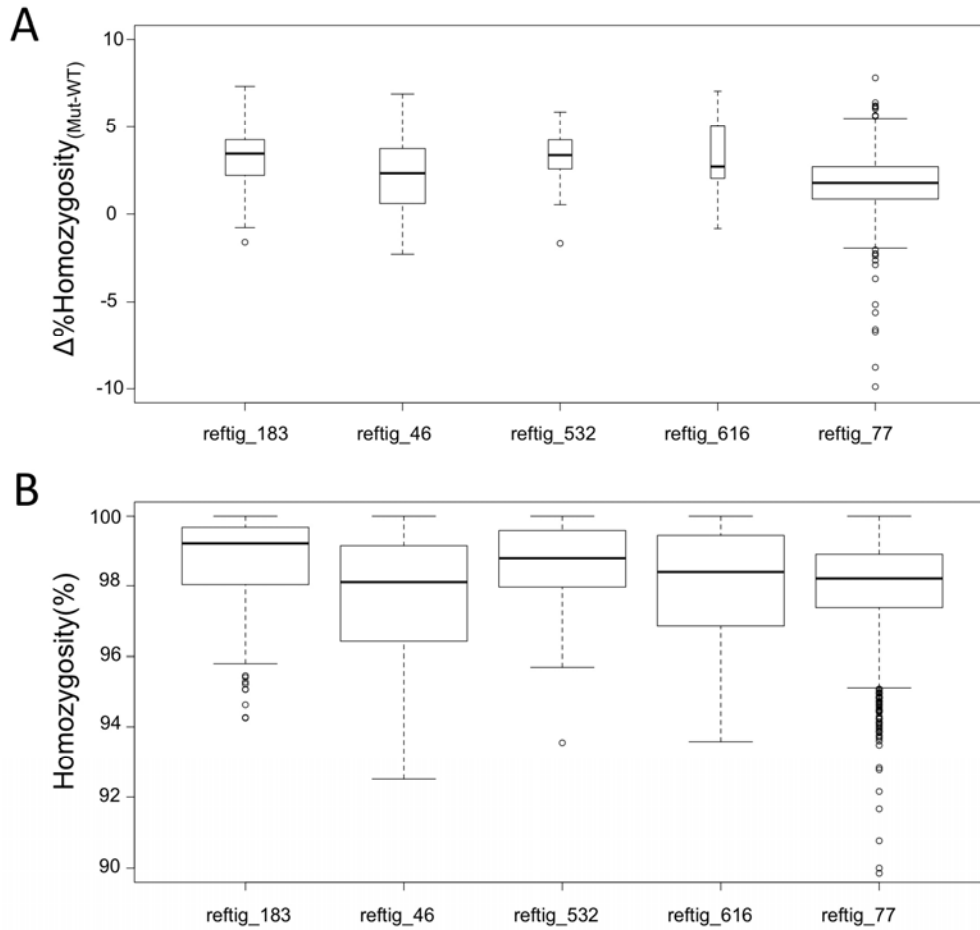

**Figure S4** Homozygosity mapping analysis for *bugeye*. **A)** Box-whisker plot of  $\Delta$ homozygosity values for each candidate high value reftig from Figure 2B.  $\Delta$ homozygosity values were calculated for 1 Kb windows across each reftig. Width of boxplots depicts amount of data points for each reftig. Solid lines indicate median values, and whiskers indicate extreme values of reftig. Reftig 183 had the highest median  $\Delta$ homozygosity value (3.46%). **B)** Box-whisker plot of homozygosity values for the candidate reftigs (mutant sample only). Plots were done as above for panel A.
